# Supplementary material for: Abolishing the prelamin A ZMPSTE24 cleavage site leads to progeroid phenotypes with near-normal longevity in mice
Source: PubMed Central journal article supplement — Proc Natl Acad Sci U S A. 2022 Feb 23;119(9):e2118695119. doi: 10.1073/pnas.2118695119 (PMC8892526; doi:10.1073/pnas.2118695119), 2022-02-23
Supplement: pnas.2118695119.sapp.pdf [file pnas.2118695119.sapp.pdf]

## Supplementary Information for

### Abolishing the prelamin A ZMPSTE24 cleavage site leads to progeroid phenotypes with near-normal longevity in mice

Yuexia Wang<sup>a,b</sup>, Khurts Shilagardi<sup>c</sup>, Trunee Hsu<sup>d,e</sup>, Kamsi O. Odinammadu<sup>c</sup>, Takamitsu Maruyama<sup>f,1</sup>, Wei Wu<sup>a,b</sup>, Chyuan-Sheng Lin<sup>b,g</sup>, Christopher B. Damoci<sup>g</sup>, Eric D. Spear<sup>c</sup>, Ji-Yeon Shin<sup>a,b</sup>, Wei Hsu<sup>e,1,2,3</sup>, Susan Michaelis<sup>c,4</sup>, and Howard J. Worman<sup>a,b,4</sup>

<sup>a</sup>Department of Medicine, Vagelos College of Physicians and Surgeons, Columbia University, New York, NY 10032; <sup>b</sup>Department of Pathology and Cell Biology, Vagelos College of Physicians and Surgeons, Columbia University, New York, NY 10032; <sup>c</sup>Department of Cell Biology, Johns Hopkins University School of Medicine, Baltimore, MD 21287; <sup>d</sup>Department of Biology, Case Western Reserve University, Cleveland, OH 44106; <sup>e</sup>Department of Biomedical Genetics, University of Rochester Medical Center, Rochester, NY 14642; <sup>f</sup>Department of Dentistry, University of Rochester Medical Center, Rochester, NY 14642; <sup>g</sup>Herbert Irving Comprehensive Cancer Center, Columbia University, New York, NY 10032

<sup>1</sup>Present address: The Forsyth Institute, Cambridge, MA 02142

<sup>2</sup>Present address: Department of Developmental Biology, Harvard School of Dental Medicine, Harvard University, Boston, MA 02155

<sup>3</sup>Present address: Harvard Stem Cell Institute, Harvard University, Cambridge, MA 02138

<sup>4</sup>Corresponding authors: Susan Michaelis; Howard J. Worman

Email: michaelis@jhmi.edu; hjw14@columbia.edu

#### **This PDF file includes:**

Figures S1 to S6

Table S1

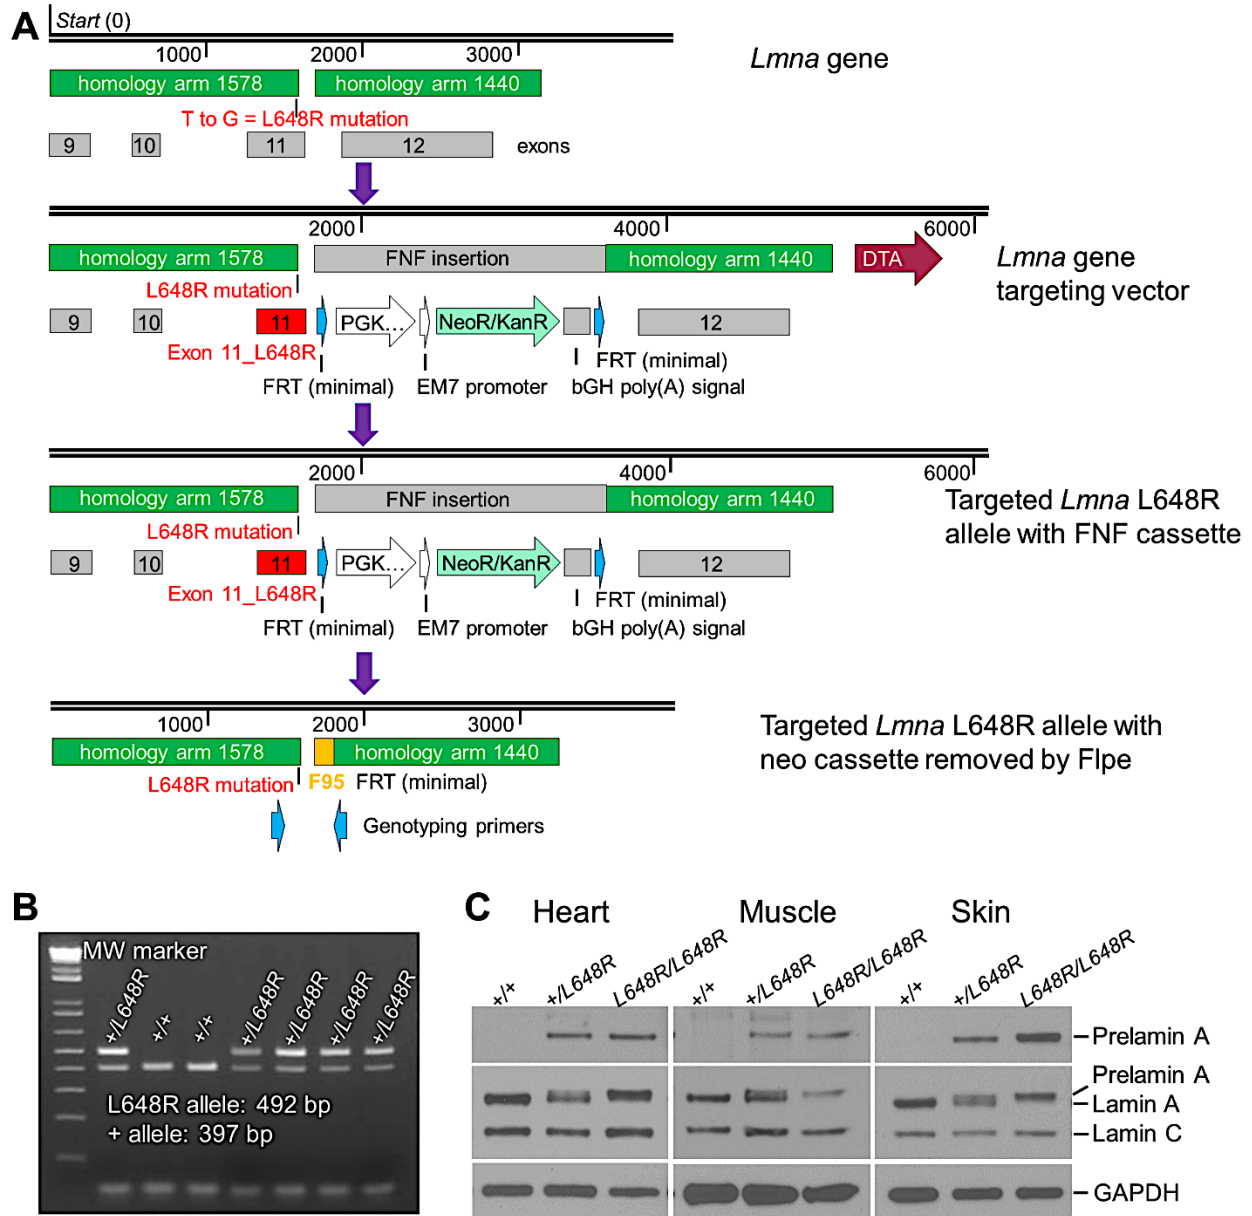

**Fig. S1.** Generation of mice with a *Lmna* L648R allele. (A) Schematic diagram showing procedure used to generate the *Lmna* L648R allele by recombineering. See Materials and Methods above for additional details. (B) Ethidium bromide-stained agarose gel showing PCR-amplified DNA from *Lmna*<sup>+/*L648R*</sup> (+/*L648R*) founder mice and littermate *Lmna*<sup>+/+</sup> (+/+) mice. The amplified fragment of the *Lmna* L648R allele is 492 base pairs (bp) and the wild type (+) allele 397 bp. This is because the mutant allele contains the F95 DNA fragment shown in A. The left lane of the gel (MW marker) shows an Invitrogen 1 Kb Plus DNA Ladder. (C) Immunoblots of protein extracts from heart, skeletal muscle (Muscle) and skin of +/+, +/*L648R* and *Lmna*<sup>*L648R/L648R*</sup> (*L648R/L648R*) mice. Blots were probed with an antibody specific for prelamin A (top), an anti-lamin A/C antibody that recognized prelamin A, lamin A and lamin C (middle) or anti-GAPDH antibody as loading control (bottom).

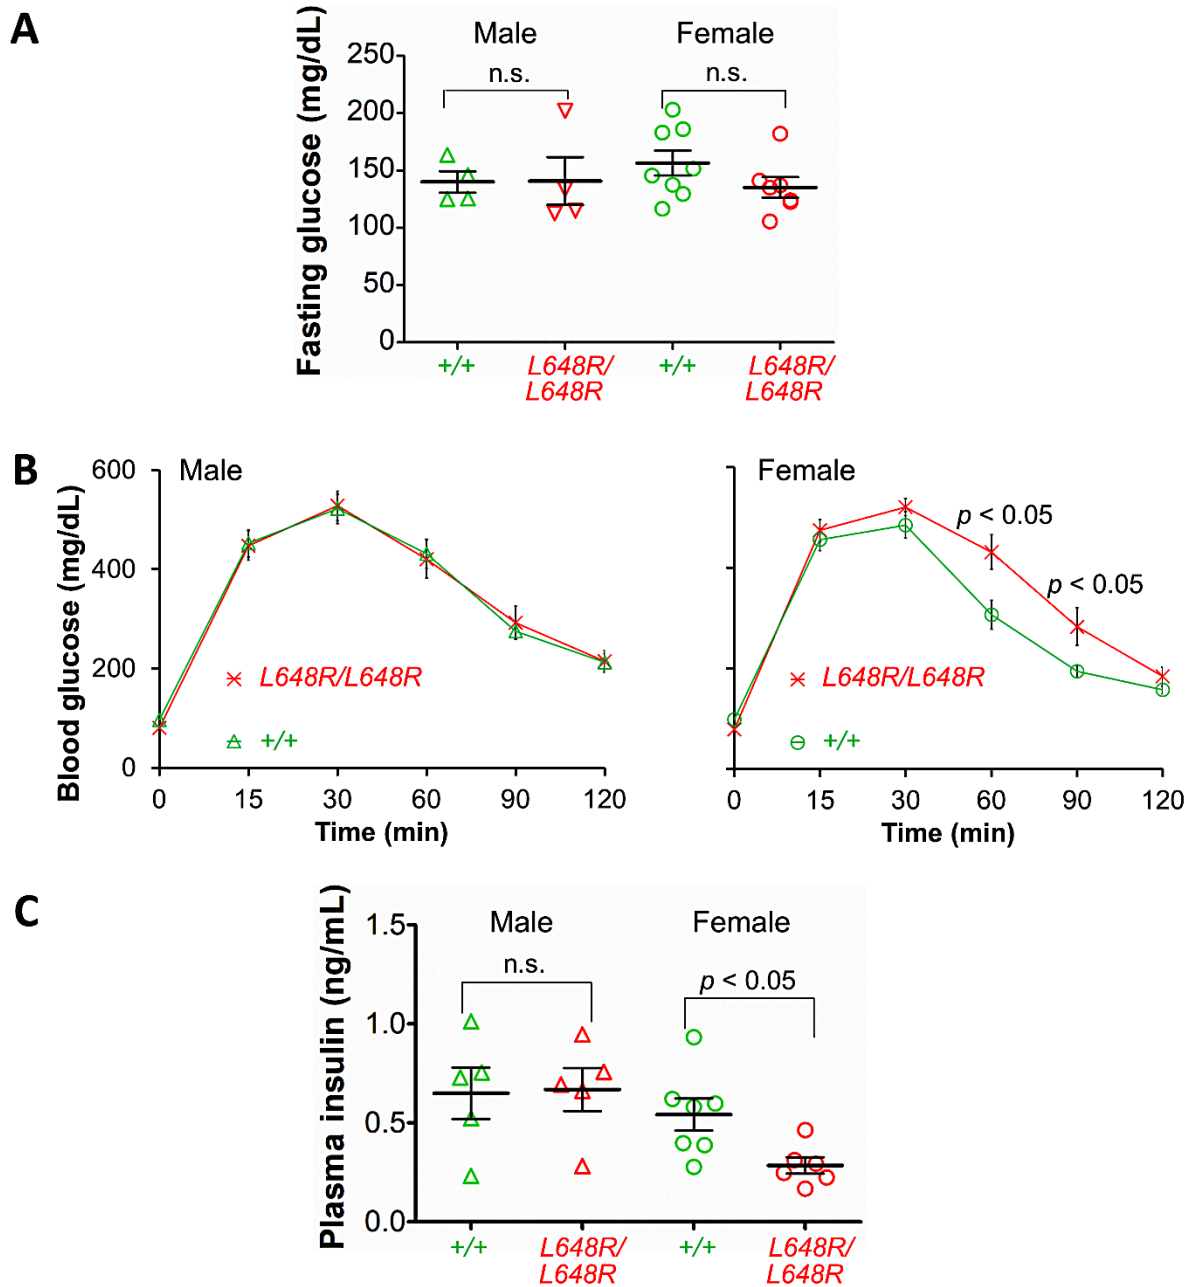

**Fig. S2.** Blood glucose and insulin concentrations in *Lmna*<sup>L648R/L648R</sup> mice. (A) Fasting blood glucose concentrations in male and female *Lmna*<sup>+/+</sup> (+ / +) and *Lmna*<sup>L648R/L648R</sup> (L648R/L648R) mice at 30 weeks of age. Each triangle or circle represents value for an individual animal; long horizontal bars represent mean and errors bars indicate SEM. (B) Blood glucose concentration versus time before and after injection of a glucose bolus in overnight-fasted L648R/L648R and + / + mice at 35 weeks. Values are means and error bars indicate SEM (*N* = 8 per genotype for male mice, and *N* = 12 per genotype for female mice). (C) Fasting plasma insulin concentrations in 30-week-old male and female + / + and L648R/L648R mice. Each triangle or circle represents value for an individual mouse; long horizontal bars represent means and errors bars indicate SEM.

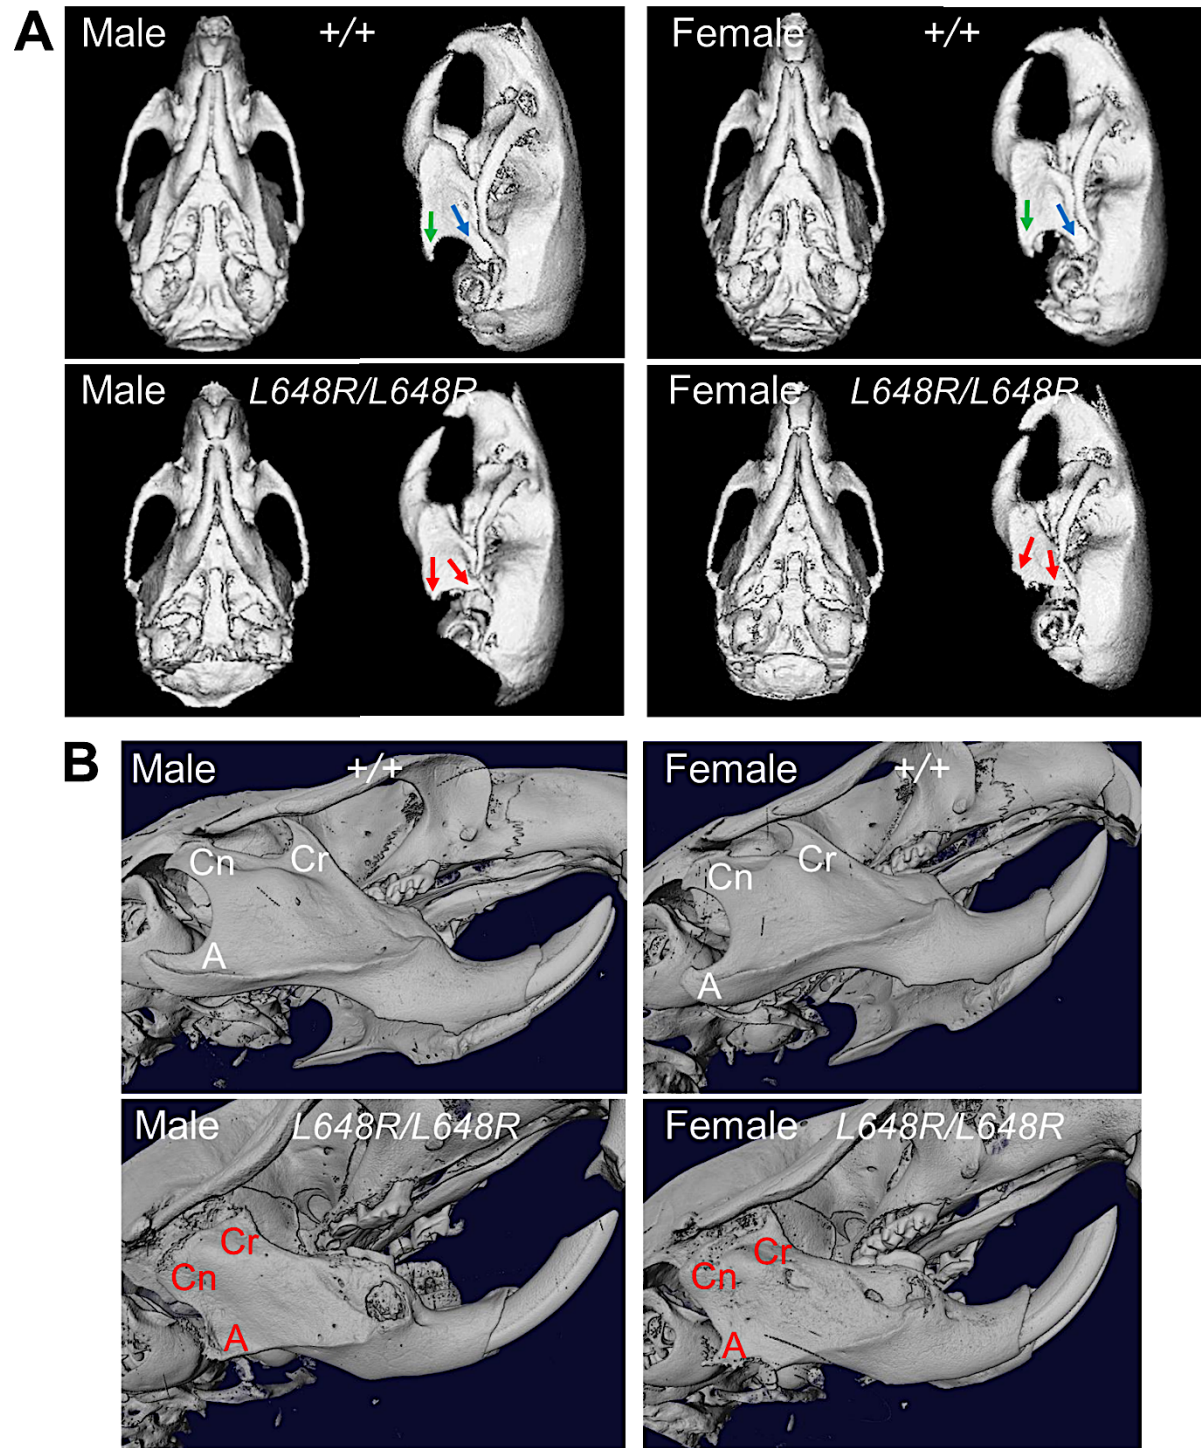

**Fig. S3.** Micro-CT images of skulls of  $Lmna^{L648R/L648R}$  mice at approximately 30 weeks of age. (A) Micro-CT-generated images showing representative ventral and left lateral views of skulls of living male and female  $Lmna^{+/+}$  ( $+/+$ ) and  $Lmna^{L648R/L648R}$  ( $L648R/L648R$ ) mice. In  $+/+$  mice, green arrows indicate mandibular angular process and blue arrows condylar process. These processes are smaller in  $L648R/L648R$  mice (red arrows). (B) Micro-CT-scanned and 3D-reconstructed images of skulls from male and female  $+/+$  and  $L648R/L648R$  mice. Cr: coronoid process; Cn: condylar process; A: angular process. Red lettering indicates degeneration of these processes in the mutant mice.

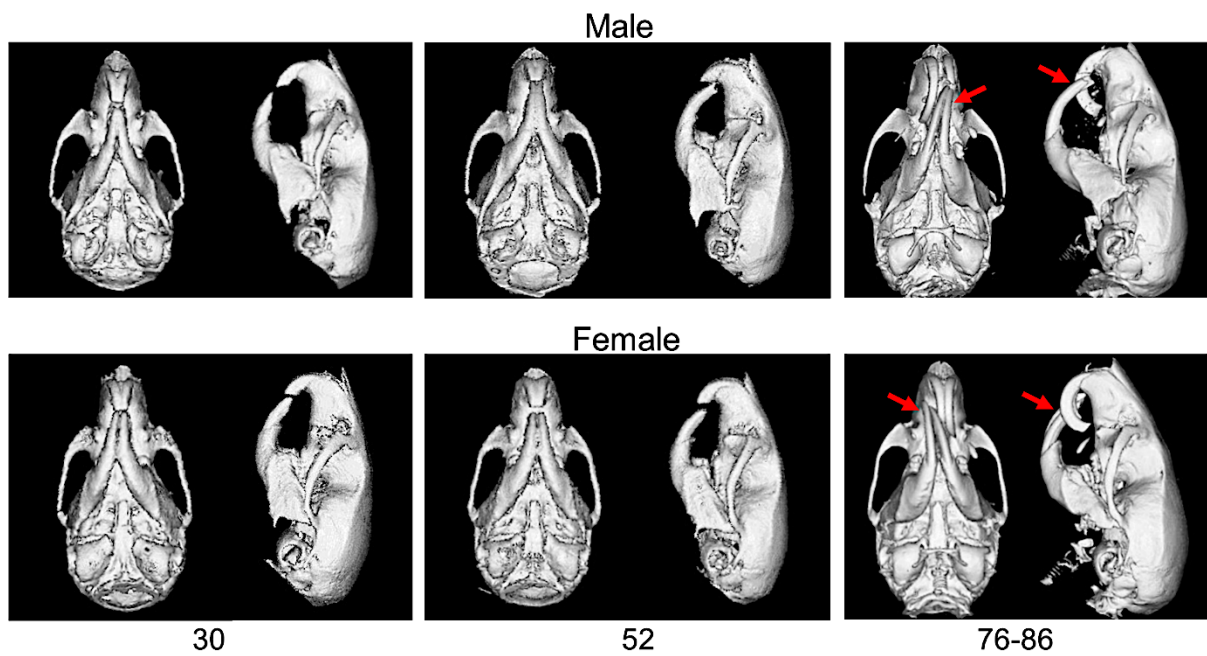

**Fig. S4.** Radiological confirmation of dental malocclusion in older *Lmna*<sup>L648R/L648R</sup> mice. Micro-CT-scanned and 3D-rendered images showing representative ventral and left lateral views of skulls of living male and female *Lmna*<sup>L648R/L648R</sup> mice at the ages indicated in weeks confirming dental malocclusion (red arrows).

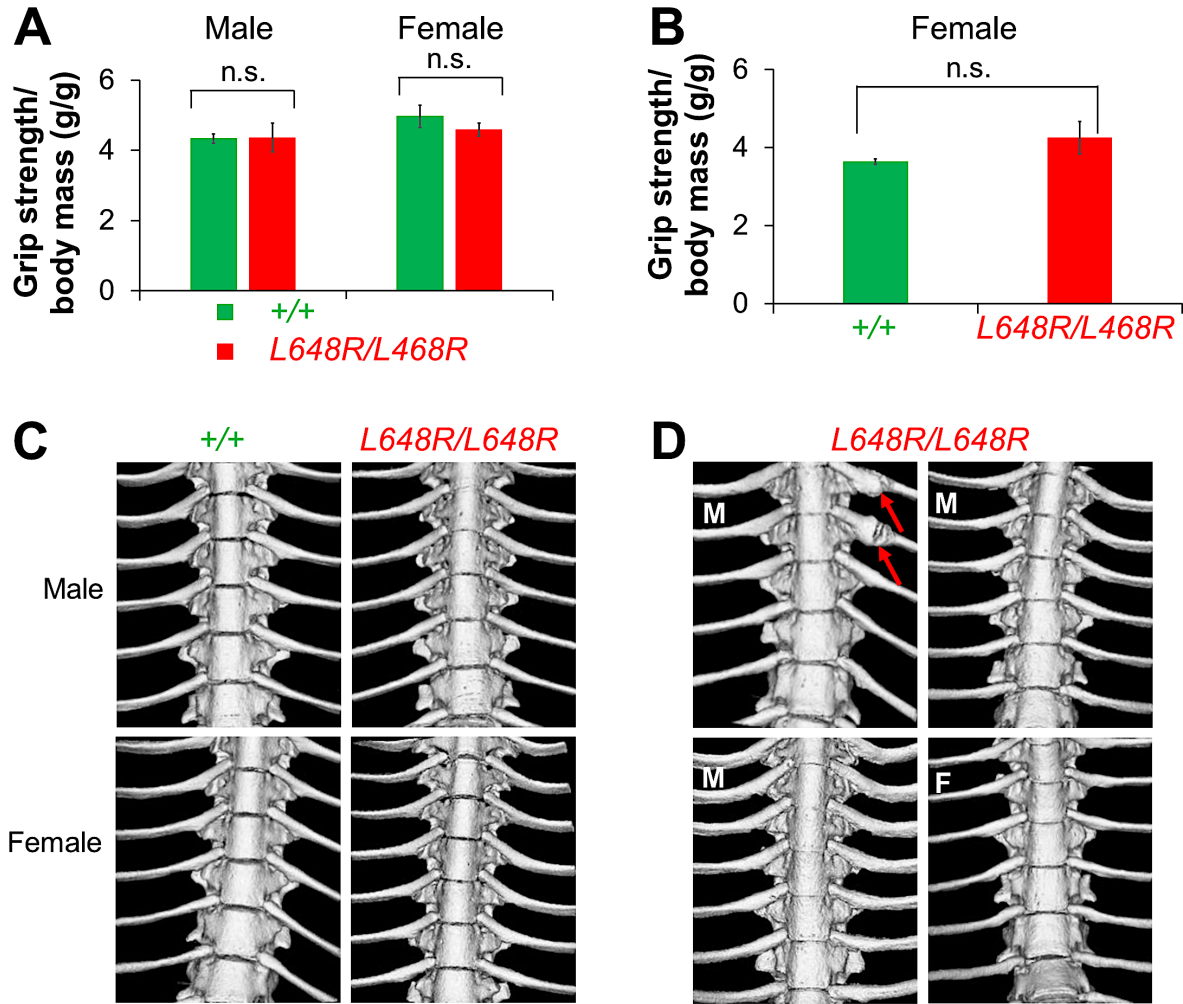

**Fig. S5.** Grip strength and rare rib fractures in *Lmna*<sup>L648R/L648R</sup> mice. (A) Grip strength normalized to body mass in male *Lmna*<sup>+/+</sup> (+/+) (*N* = 3) and *Lmna*<sup>L648R/L648R</sup> (*L648R/L648R*) (*N* = 3) and female +/+ (*N* = 4) and *L648R/L648R* (*N* = 4) mice at 35 weeks of age. (B) Grip strength normalized to body mass in female +/+ (*N* = 3) and *L648R/L648R* (*N* = 3) mice at 104-120 weeks of age. (C) Representative 3D renderings of the micro-CT images of dissected and fixed middle thoracic spines and ribs of male and female +/+ and *L648R/L648R* mice at 30 weeks of age with no evidence of rib fractures. (D) Representative 3D renderings of the micro-CT images of dissected and fixed middle thoracic spines and ribs of three male (M) and one female (F) *L648R/L648R* mice at 76-84 weeks of age, showing two rib fractures (red arrows) in one mouse.

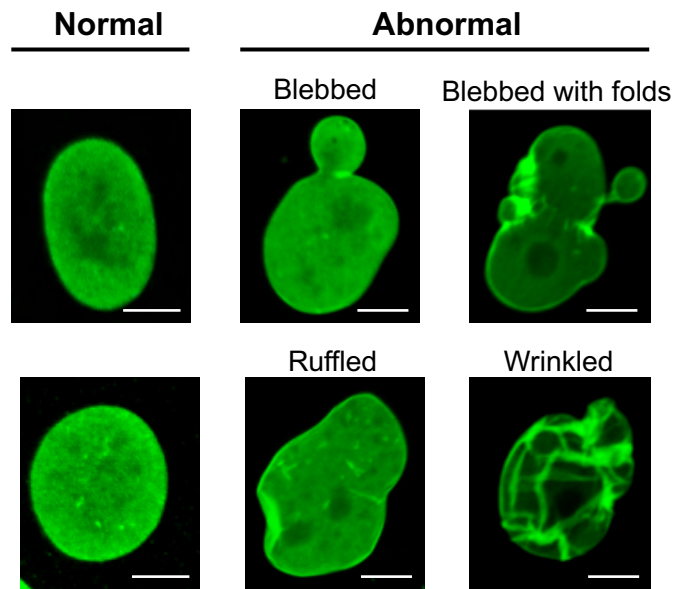

**Fig. S6.** Gallery of representative normal and abnormal nuclear morphologies observed in *Lmna*<sup>L648R/L648R</sup> MEFs. Immunofluorescence photomicrographs of *Lmna*<sup>L648R/L648R</sup> MEFs labeled with anti-lamin A/C antibodies show morphologically normal ovoid or round nuclei with smooth edges (left) and abnormal nuclei with a variety of indicated shapes and characteristics (right). These criteria were used to determine the percentage of abnormal nuclei in Fig. 5. Scale bars: 10  $\mu$ m.

**Table S1.** Blood biochemical parameters in 30-week-old male and female *Lmna*<sup>+/+</sup> and *Lmna*<sup>L648R/L648R</sup> mice.

| Parameter                | Reference Ranges and Units | Male                       |                                    | Female                     |                                    |
|--------------------------|----------------------------|----------------------------|------------------------------------|----------------------------|------------------------------------|
|                          |                            | <i>Lmna</i> <sup>+/+</sup> | <i>Lmna</i> <sup>L648R/L648R</sup> | <i>Lmna</i> <sup>+/+</sup> | <i>Lmna</i> <sup>L648R/L648R</sup> |
| Total protein            | 3.5-7.2 g/dL               | 5.64 ± 0.12                | 5.52 ± 0.09                        | 5.47 ± 0.09                | 5.60 ± 0.13                        |
| Albumin                  | 2.5-3.4 g/dL               | 2.36 ± 0.07                | 2.50 ± 0.08                        | 2.37 ± 0.10                | 2.57 ± 0.06                        |
| Alkaline phosphatase     | 35-96 U/L                  | 79.80 ± 5.43               | 79.40 ± 3.68                       | 118.00 ± 12.72             | 136.33 ± 16.88                     |
| Total bilirubin          | 0-0.9 mg/dL                | 0.30 ± 0.08                | 0.15 ± 0.04                        | 0.12 ± 0.02                | 0.10 ± 0                           |
| Phosphorus               | 5.7-9.2 mg/dL              | 10.48 ± 1.38               | 9.40 ± 0.97                        | 8.69 ± 0.43                | 7.17 ± 0.82                        |
| Cholesterol              | 40-130 mg/dL               | 94.00 ± 8.00               | 77.00 ± 3.61                       | 102.20 ± 8.07              | 74.67 ± 6.74                       |
| Alanine aminotransferase | 17-77 U/L                  | 46.80 ± 3.65               | 56.00 ± 16.93                      | 39.43 ± 4.71               | 36.33 ± 3.98                       |
| Calcium                  | 7.1-10.1 mg/dL             | 8.24 ± 0.48                | 8.42 ± 0.50                        | 8.30 ± 0.38                | 7.95 ± 0.38                        |
| Creatinine               | 0.2-0.9 mg/dL              | 0.36 ± 0.07                | 0.35 ± 0.09                        | 0.34 ± 0.03                | 0.40 ± 0.07                        |
| Blood urea nitrogen      | 8-33 mg/dL                 | 22.76 ± 0.64               | 22.28 ± 1.01                       | 23.34 ± 2.01               | 24.45 ± 1.10                       |
| Triglycerides            | 16-164 mg/dL               | 78.00 ± 5.45               | 71.40 ± 5.88                       | 70.14 ± 3.06               | 71.83 ± 5.53                       |

Values are means ± SEM. *N* = 5 for male *Lmna*<sup>+/+</sup> and *N* = 5 for male *Lmna*<sup>L648R/L658R</sup> mice; *N* = 7 for female *Lmna*<sup>+/+</sup> and *N* = 6 for female *Lmna*<sup>L648R/L658R</sup> mice.
